# Supplementary material for: Clustering of circular consensus sequences: accurate error correction and assembly of single molecule real-time reads from multiplexed amplicon libraries
Source: PubMed Central journal article supplement (PMC6102811; doi:10.1186/s12859-018-2293-0), 2018-08-20
Supplement: 12859_2018_2293_MOESM1_ESM.pdf [file 12859_2018_2293_MOESM1_ESM.pdf]

# Clustering of Circular Consensus Sequences: Accurate Error Correction and Assembly of Single Molecule Real-Time Reads from Multiplexed Amplicon Libraries

Felix Francis, Michael D. Dumas, Scott B. Davis and Randall J. Wisser

## Supplementary Tables

**Table S1. PacBio reads of insert protocol output metrics.**

| Metric                      | Amplicon library |             |
|-----------------------------|------------------|-------------|
|                             | Single           | Multiplex   |
| Reads of Insert             | 136,008,130      | 210,038,102 |
| Mean Read Length of Insert  | 3,697            | 4,094       |
| Mean Read Quality of Insert | 98.54%           | 98.39%      |
| Mean Number of Passes       | 9.39             | 9.00        |

**Table S2. Padded and barcoded primer sequences used for amplification of six maize lines.**

| Sample | Primer   | Sequence                                          |
|--------|----------|---------------------------------------------------|
| P39    | 11.4_f_1 | GTTAGCTATACATGACTCTGCGCGGCTGTGAAGATGTCATGGACA     |
| Tx303  | 11.4_f_2 | GTTAGTGTGTATCAGTACATGGCGGCTGTGAAGATGTCATGGACA     |
| Mo17   | 11.4_f_3 | GTTAGTATGTGATCGTCTCTCGCGGCTGTGAAGATGTCATGGACA     |
| Hp301  | 11.4_f_4 | GTTAGTACGACTACATATCAGGCGGCTGTGAAGATGTCATGGACA     |
| B73    | 11.4_f_5 | GTTAGTATCTCTGTAGAGTCTGCGGCTGTGAAGATGTCATGGACA     |
| CML277 | 11.4_f_6 | GTTAGTCTATGTCTCAGTAGTGCGGCTGTGAAGATGTCATGGACA     |
| P39    | 11.4_r_1 | GTTAGGCAGAGTCATGTATAGTGGAACAAGAGCTGGCCTGTTTCA     |
| Tx303  | 11.4_r_2 | GTTAGCATGTACTGATACACATGGAACAAGAGCTGGCCTGTTTCA     |
| Mo17   | 11.4_r_3 | GTTAGGAGAGACGATCACATATGGAACAAGAGCTGGCCTGTTTCA     |
| Hp301  | 11.4_r_4 | GTTAGCTGATATGTAGTCGTATGGAACAAGAGCTGGCCTGTTTCA     |
| B73    | 11.4_r_5 | GTTAGAGACTCTACAGAGATATGGAACAAGAGCTGGCCTGTTTCA     |
| CML277 | 11.4_r_6 | GTTAGACTACTGAGACATAGATGGAACAAGAGCTGGCCTGTTTCA     |
| P39    | 2.2_f_1  | GTTAGCTATACATGACTCTGCGCGGCATACAACAGGCAAAGTTAGC    |
| Tx303  | 2.2_f_2  | GTTAGTGTGTATCAGTACATGGCGGCATACAACAGGCAAAGTTAGC    |
| Mo17   | 2.2_f_3  | GTTAGTATGTGATCGTCTCTCGCGGCATACAACAGGCAAAGTTAGC    |
| Hp301  | 2.2_f_4  | GTTAGTACGACTACATATCAGGCGGCATACAACAGGCAAAGTTAGC    |
| B73    | 2.2_f_5  | GTTAGTATCTCTGTAGAGTCTGCGGCATACAACAGGCAAAGTTAGC    |
| CML277 | 2.2_f_6  | GTTAGTCTATGTCTCAGTAGTGCGGCATACAACAGGCAAAGTTAGC    |
| P39    | 2.2_r_1  | GTTAGGCAGAGTCATGTATAGGGCTGCTATGGTCTGTATCGTCTCCAAC |
| Tx303  | 2.2_r_2  | GTTAGCATGTACTGATACACAGGCTGCTATGGTCTGTATCGTCTCCAAC |
| Mo17   | 2.2_r_3  | GTTAGGAGAGACGATCACATAGGCTGCTATGGTCTGTATCGTCTCCAAC |
| Hp301  | 2.2_r_4  | GTTAGCTGATATGTAGTCGTAGGCTGCTATGGTCTGTATCGTCTCCAAC |

|        |          |                                                       |
|--------|----------|-------------------------------------------------------|
| B73    | 2.2.r.5  | GTTAGAGACTCTACAGAGATAGGCTGCTATGGTCTGTATCGTCTCCAAC     |
| CML277 | 2.2.r.6  | GTTAGACTACTGAGACATAGAGGCTGCTATGGTCTGTATCGTCTCCAAC     |
| P39    | 2.1.f.1  | GTTAGCTATACATGACTCTGCTTGTGGCATCAGTAGGGTCTGAAAC        |
| Tx303  | 2.1.f.2  | GTTAGTGTGTATCAGTACATGTTGTGGCATCAGTAGGGTCTGAAAC        |
| Mo17   | 2.1.f.3  | GTTAGTATGTGATCGTCTCTCTTGTGGCATCAGTAGGGTCTGAAAC        |
| Hp301  | 2.1.f.4  | GTTAGTACGACTACATATCAGTTGTGGCATCAGTAGGGTCTGAAAC        |
| B73    | 2.1.f.5  | GTTAGTATCTCTGTAGAGTCTTTGTGGCATCAGTAGGGTCTGAAAC        |
| CML277 | 2.1.f.6  | GTTAGTCTATGTCTCAGTAGTTTGTGGCATCAGTAGGGTCTGAAAC        |
| P39    | 2.1.r.1  | GTTAGGCAGAGTCATGTATAGCCTTCCCTTAACCAAAGTTGAATAGCAG     |
| Tx303  | 2.1.r.2  | GTTAGCATGTAAGTACTGATACACACCTTCCCTTAACCAAAGTTGAATAGCAG |
| Mo17   | 2.1.r.3  | GTTAGGAGAGACGATCACATACCTTCCCTTAACCAAAGTTGAATAGCAG     |
| Hp301  | 2.1.r.4  | GTTAGCTGATATGTAGTCGTACCTTCCCTTAACCAAAGTTGAATAGCAG     |
| B73    | 2.1.r.5  | GTTAGAGACTCTACAGAGATACCTTCCCTTAACCAAAGTTGAATAGCAG     |
| CML277 | 2.1.r.6  | GTTAGACTACTGAGACATAGACCTTCCCTTAACCAAAGTTGAATAGCAG     |
| P39    | 13.4.f.1 | GTTAGCTATACATGACTCTGCTCCTCATTCTCCTCTCGGAATCGCT        |
| Tx303  | 13.4.f.2 | GTTAGTGTGTATCAGTACATGTCCTCATTCTCCTCTCGGAATCGCT        |
| Mo17   | 13.4.f.3 | GTTAGTATGTGATCGTCTCTCTCCTCATTCTCCTCTCGGAATCGCT        |
| Hp301  | 13.4.f.4 | GTTAGTACGACTACATATCAGTCCTCATTCTCCTCTCGGAATCGCT        |
| B73    | 13.4.f.5 | GTTAGTATCTCTGTAGAGTCTTCCCTCATTCTCCTCTCGGAATCGCT       |
| CML277 | 13.4.f.6 | GTTAGTCTATGTCTCAGTAGTTCCTCATTCTCCTCTCGGAATCGCT        |
| P39    | 13.4.r.1 | GTTAGGCAGAGTCATGTATAGATACCACCTCAAGAAAGCAGGCCTA        |
| Tx303  | 13.4.r.2 | GTTAGCATGTAAGTACTGATACACAATACCACCTCAAGAAAGCAGGCCTA    |
| Mo17   | 13.4.r.3 | GTTAGGAGAGACGATCACATAATACCACCTCAAGAAAGCAGGCCTA        |
| Hp301  | 13.4.r.4 | GTTAGCTGATATGTAGTCGTAAATACCACCTCAAGAAAGCAGGCCTA       |
| B73    | 13.4.r.5 | GTTAGAGACTCTACAGAGATAATACCACCTCAAGAAAGCAGGCCTA        |
| CML277 | 13.4.r.6 | GTTAGACTACTGAGACATAGAATACCACCTCAAGAAAGCAGGCCTA        |
| P39    | 6.5.f.1  | GTTAGCTATACATGACTCTGCTTGGCCGCTAAACCATCTCGCGATT        |
| Tx303  | 6.5.f.2  | GTTAGTGTGTATCAGTACATGCTTGGCCGCTAAACCATCTCGCGATT       |
| Mo17   | 6.5.f.3  | GTTAGTATGTGATCGTCTCTCCTTGGCCGCTAAACCATCTCGCGATT       |
| Hp301  | 6.5.f.4  | GTTAGTACGACTACATATCAGCTTGGCCGCTAAACCATCTCGCGATT       |
| B73    | 6.5.f.5  | GTTAGTATCTCTGTAGAGTCTCTTGGCCGCTAAACCATCTCGCGATT       |
| CML277 | 6.5.f.6  | GTTAGTCTATGTCTCAGTAGTCTTGGCCGCTAAACCATCTCGCGATT       |
| P39    | 6.5.r.1  | GTTAGGCAGAGTCATGTATAGTTCTTGGCGCCACCTCCTTCTGAAA        |
| Tx303  | 6.5.r.2  | GTTAGCATGTAAGTACTGATACACATTCTTGGCGCCACCTCCTTCTGAAA    |
| Mo17   | 6.5.r.3  | GTTAGGAGAGACGATCACATATTCTTGGCGCCACCTCCTTCTGAAA        |
| Hp301  | 6.5.r.4  | GTTAGCTGATATGTAGTCGTATTCTTGGCGCCACCTCCTTCTGAAA        |
| B73    | 6.5.r.5  | GTTAGAGACTCTACAGAGATATTCTTGGCGCCACCTCCTTCTGAAA        |
| CML277 | 6.5.r.6  | GTTAGACTACTGAGACATAGATTCTTGGCGCCACCTCCTTCTGAAA        |
| P39    | 1.6.f.1  | GTTAGCTATACATGACTCTGCAAGCTCTAAGCGCCGCCATGGTTA         |
| Tx303  | 1.6.f.2  | GTTAGTGTGTATCAGTACATGAAGCTCTAAGCGCCGCCATGGTTA         |
| Mo17   | 1.6.f.3  | GTTAGTATGTGATCGTCTCTCAAGCTCTAAGCGCCGCCATGGTTA         |
| Hp301  | 1.6.f.4  | GTTAGTACGACTACATATCAGAAGCTCTAAGCGCCGCCATGGTTA         |
| B73    | 1.6.f.5  | GTTAGTATCTCTGTAGAGTCTAAGCTCTAAGCGCCGCCATGGTTA         |
| CML277 | 1.6.f.6  | GTTAGTCTATGTCTCAGTAGTAAGCTCTAAGCGCCGCCATGGTTA         |
| P39    | 1.6.r.1  | GTTAGGCAGAGTCATGTATAGGCATCTTGGCGTACACCTTGTGG          |
| Tx303  | 1.6.r.2  | GTTAGCATGTAAGTACTGATACACAGCATCTTGGCGTACACCTTGTGG      |
| Mo17   | 1.6.r.3  | GTTAGGAGAGACGATCACATAGCATCTTGGCGTACACCTTGTGG          |
| Hp301  | 1.6.r.4  | GTTAGCTGATATGTAGTCGTAGCATCTTGGCGTACACCTTGTGG          |
| B73    | 1.6.r.5  | GTTAGAGACTCTACAGAGATAGCATCTTGGCGTACACCTTGTGG          |
| CML277 | 1.6.r.6  | GTTAGACTACTGAGACATAGAGCATCTTGGCGTACACCTTGTGG          |

## Supplementary Figures

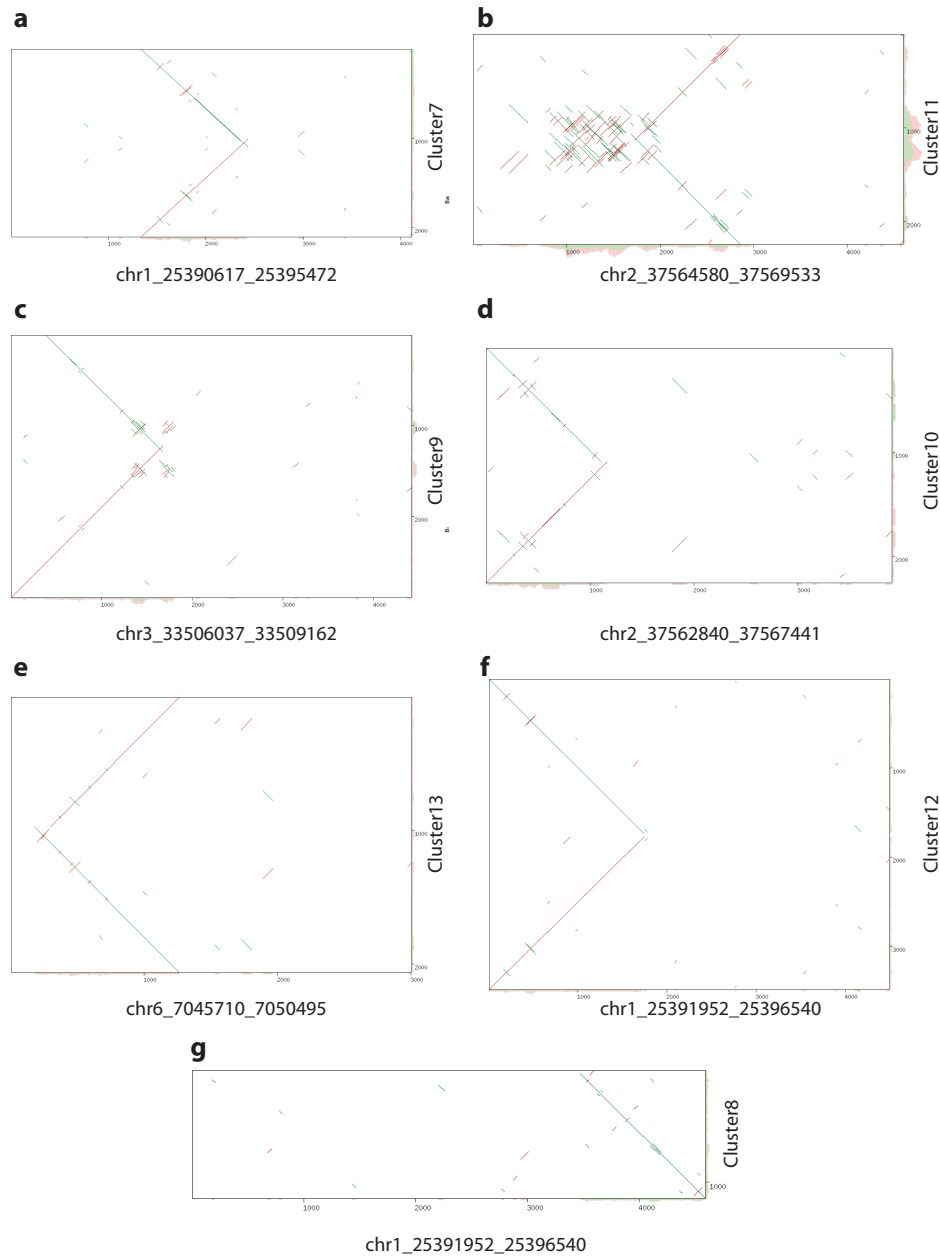

**Figure S1. Dot-plots of alignments between amplicon reference sequences and inaccurate consensus sequences generated by LAA.** (a-g) The reference sequence for each amplicon is labeled according the chromosome, start and stop position in the reference genome of B73 v3 (x-axes). The consensus sequences are labeled 7-13 (y-axes). Green lines show alignments in the same orientation while red lines show alignments in reverse orientation.
